# Supplementary material for: BA2XBr4 (X = Pb, Cu, Sn): from lead to lead-free halide perovskite scintillators
Source: Royal Society of Chemistry journal article supplement (doi:10.1039/d2ma00258b), 2022-01-01
Supplement: d2ma00258b1.pdf [file d2ma00258b1.pdf]

## Supporting Information for

### **BA<sub>2</sub>XBr<sub>4</sub> (X = Pb, Cu, Sn): From Lead to Lead-Free Halide Perovskite Scintillators**

Lina Jaya Diguna,<sup>1, a)</sup> Luke Jonathan,<sup>1</sup> Muhammad Haris Mahyuddin,<sup>2</sup> Arramel,<sup>3, 4</sup> Francesco Maddalena,<sup>5</sup> Irma Mulyani,<sup>6</sup> Djulia Onggo,<sup>6</sup> Abdellah Bachiri,<sup>7</sup> Marcin E. Witkowski,<sup>7</sup> Michal Makowski,<sup>7</sup> Dominik Kowal,<sup>8</sup> Winicjusz Drozdowski,<sup>7, b)</sup> and Muhammad Danang Birowosuto<sup>8, c)</sup>

<sup>1)</sup> *Department of Renewable Energy Engineering, Universitas Prasetiya Mulya, Kavling Edutown I.1, Jl. BSD Raya Utama, BSD City, Tangerang 15339, Indonesia.*

<sup>2)</sup> *Research Group of Advanced Functional Materials and Research Center for Nanoscience and Nanotechnology, Institut Teknologi Bandung, Jl. Ganesha 10, Bandung 40132, Indonesia.*

<sup>3)</sup> *Department of Physics, National University of Singapore, 2 Science Drive 3 Singapore 117551, Singapore.*

<sup>4)</sup> *Nano Center Indonesia, Jl. PUSPIPTEK, South Tangerang, Banten 15314, Indonesia.*

<sup>5)</sup> *CINTRA UMI CNRS/NTU/THALES 3288, Research Techno Plaza, 50 Nanyang Drive, Border X Block, Level 6, Singapore 637553, Singapore.*

<sup>6)</sup> *Inorganic and Physical Chemistry Research Group, Faculty of Mathematics and Natural Sciences, Institut Teknologi Bandung, Jl. Ganesha 10, Bandung 40132, Indonesia.*

<sup>7)</sup> *Institute of Physics, Faculty of Physics, Astronomy, and Informatics, Nicolaus Copernicus University in Torun, ul. Grudziadzka 5, Torun 87-100, Poland.*

<sup>8)</sup> *Lukasiewicz Research Network-PORT Polish Center for Technology Development, Stabłowicka 147, 54-066 Wrocław, Poland*

(Dated: 14 May 2022)

---

a) Electronic mail: [lina.diguna@prasetiyamulya.ac.id](mailto:lina.diguna@prasetiyamulya.ac.id)

b) Electronic mail: [wind@fizyka.umk.pl](mailto:wind@fizyka.umk.pl)

c) Electronic mail: [muhammad.birowosuto@port.lukasiewicz.gov.pl](mailto:muhammad.birowosuto@port.lukasiewicz.gov.pl)

## Sheet List

**Supplementary Figure S1.** Rietveld refinement of powder XRD diffractograms of (a)  $\text{BA}_2\text{PbBr}_4$ , (b)  $\text{BA}_2\text{CuBr}_4$ , and (c)  $\text{BA}_2\text{SnBr}_4$ , and (d) Comparison of XRD diffractograms of  $\text{BA}_2\text{CuBr}_4$  experiment and  $\text{CuBr}_2$  in monoclinic phase.

**Supplementary Figure S2.** (a) Spin-up and (b) spin-down band structure (left panel), corresponding total (black) and projected (color) density of states (right panel) of  $\text{BA}_2\text{CuBr}_4$ .

**Supplementary Figure S3.** XPS spectra of (a) C 1s, (b) N 1s, and (c) Br 3d of  $\text{BA}_2\text{XBr}_4$  (X = Pb, Cu, Sn).

**Supplementary Figure S4.** Tauc plot of (a)  $\text{BA}_2\text{PbBr}_4$ , (b)  $\text{BA}_2\text{CuBr}_4$ , and (c)  $\text{BA}_2\text{SnBr}_4$ .

**Supplementary Figure S5.** The fit of glow curve of  $\text{BA}_2\text{SnBr}_4$  crystals with multiple Randal-Wilkins equation.

**Supplementary Table S1.** Fitting parameters for the (negative) thermal quenching of the scintillation intensity of the perovskites.

**Supplementary Figure S6.** PL spectra recorded with integrating sphere of  $(\text{BA})_2\text{XBr}_4$  (X = Pb, Cu, Sn) crystals.

**Supplementary Table S2.** A summary of the extracted PLQY of the single crystals.

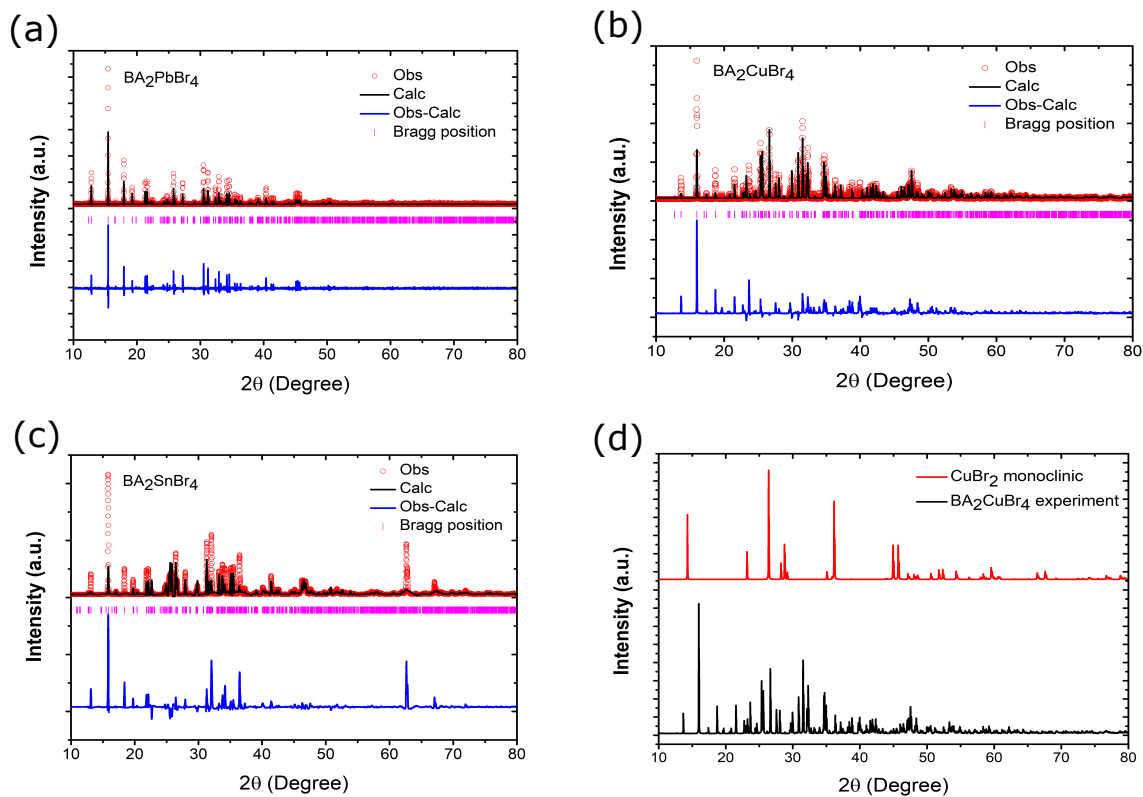

**Supplementary Figure S 1:** Rietveld refinement of powder XRD diffractograms of (a)  $\text{BA}_2\text{PbBr}_4$ , (b)  $\text{BA}_2\text{CuBr}_4$ , and (c)  $\text{BA}_2\text{SnBr}_4$ , and (d) Comparison of XRD diffractograms of  $\text{BA}_2\text{CuBr}_4$  experiment and  $\text{CuBr}_2$  in monoclinic phase. Reliability factors for  $\text{BA}_2\text{PbBr}_4$ :  $\chi^2 = 4.65$ , R-factor = 10.5,  $R_p = 91.1$ ,  $R_{wp} = 61.5$ . Reliability factors for  $\text{BA}_2\text{CuBr}_4$ :  $\chi^2 = 23.8$ , R-factor = 29.0,  $R_p = 113.0$ ,  $R_{wp} = 64.4$ . Reliability factors for  $\text{BA}_2\text{SnBr}_4$ :  $\chi^2 = 49.9$ , R-factor = 22.0,  $R_p = 79.7$ ,  $R_{wp} = 68.4$ .

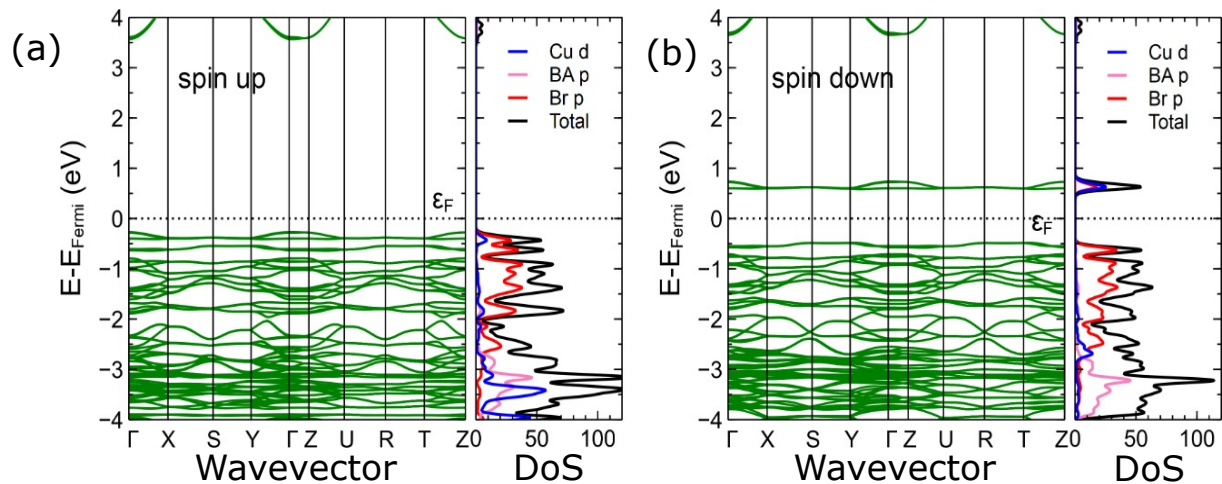

**Supplementary Figure S 2:** (a) Spin-up and (b) spin-down band structure (left panel), corresponding total (black) and projected (color) density of states (right panel) of  $\text{BA}_2\text{CuBr}_4$ .

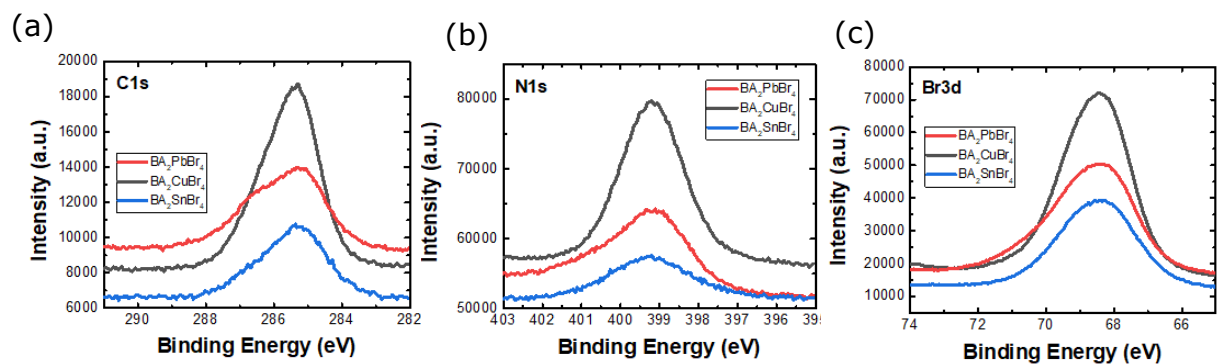

**Supplementary Figure S 3:** XPS spectra of (a) C 1s, (b) N 1s, and (c) Br 3d of  $\text{BA}_2\text{XBr}_4$  ( $\text{X} = \text{Pb}, \text{Cu}, \text{Sn}$ ).

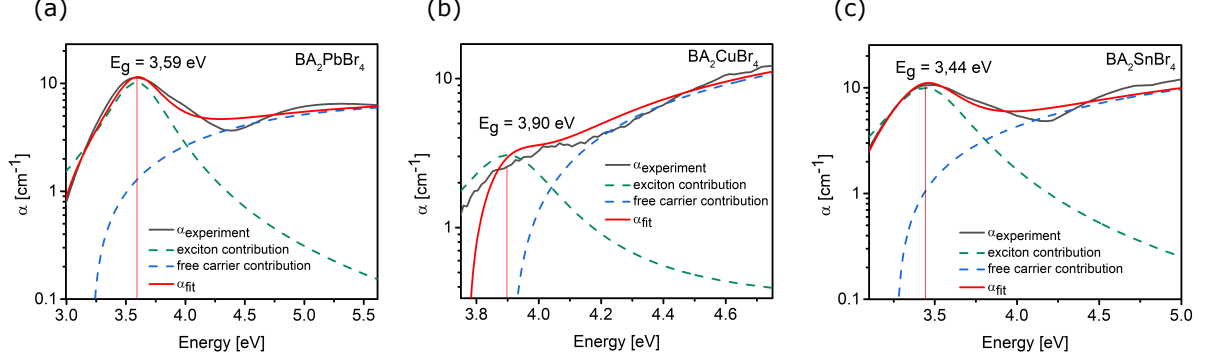

**Supplementary Figure S 4:** Absorption spectra from (a)  $\text{BA}_2\text{PbBr}_4$ , (b)  $\text{BA}_2\text{CuBr}_4$ , and (c)  $\text{BA}_2\text{SnBr}_4$  and their fitting curves with Elliot method in Equations S1 and S2.

## I. FITTING ABSORPTION CURVES

The fit was performed by using Elliot formalism<sup>1</sup>. In principle, the contributions to the absorption coefficient ( $\alpha$ ) can be defined from free carriers (continuum) ( $\alpha_c$ ) and excitons ( $\alpha_{ex}$ ).

$$\alpha(\hbar\omega) = \alpha_c + \alpha_{ex} \quad (\text{S1})$$

$$\alpha(\hbar\omega) = P_{cv} \left[ \theta(\hbar\omega - E_g) \cdot \left( \frac{\pi e^{\pi x}}{\sinh(\pi x)} \right) + R_{ex} \sum_{n=1}^{\infty} \frac{4\pi}{n^3} \cdot \delta\left(\hbar\omega - E_g + \frac{R_{ex}}{n^2}\right) \right] \quad (\text{S2})$$

Where the frequency dependence of  $P_{cv}$  is approximated as a constant and related to the interband transition matrix element,  $\hbar\omega$  is the photon energy,  $\theta(\hbar\omega - E_g)$  is the Heaviside step function,  $x$  is defined as  $\sqrt{R_{ex}/(\hbar\omega - E_g)}$ , and  $\delta$  denotes a delta function.  $R_{ex}$  is exciton Rydberg energy;  $n$  is the principle quantum number. The fits to the absorption curves are shown in Supplementary Figure S4.

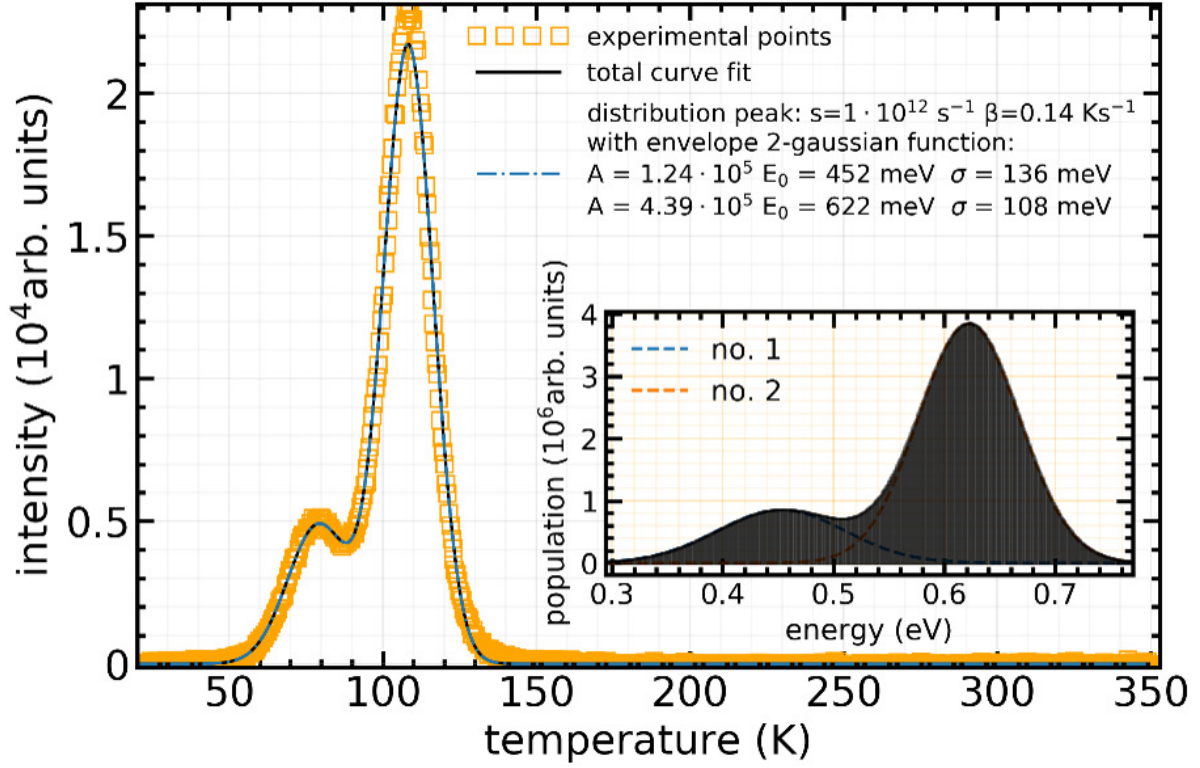

**Supplementary Figure S 5:** The fit of glow curve of  $\text{BA}_2\text{SnBr}_4$  crystals with multiple Randall-Wilkins equation<sup>2,3</sup>. The parameters of the fit are shown in the inset.

## II. GLOW CURVE FITTING

For the quantitative analysis, we deconvolute the glow curves into  $k$  glow peaks, based on the classic Randall-Wilkins equation<sup>2,3</sup>:

$$I_{TL} = \sum_{i=1}^k n_{0_i} V \sigma_i \exp\left(-\frac{E_i}{k_B T}\right) \exp\left(-\frac{\sigma_i}{\beta} \int_{T_0}^T \exp\left(-\frac{E_i}{k_B T'}\right) dT'\right) \quad (\text{S3})$$

where  $T$  is the temperature,  $\beta$  is the heating rate,  $k_B$  is the Boltzmann constant,  $n_{0_i}$  is the initial trap concentration,  $V$  is the crystal volume,  $E_i$  is the trap depth, and  $\sigma_i$  is the frequency factor of each component. The unit-less  $n_{0_i} V$  or  $A_i$  in Supplementary Figure S5 is used to compare afterglow of different crystals.

### III. FITTING TEMPERATURE-DEPENDENT RL

The fit was carried out according to the model proposed by Shibata et al.<sup>4</sup>:

$$\|I(T)\| = \frac{1 + D \cdot e^{-E/k_B T}}{1 + C_1 \cdot e^{-E_1/k_B T} + C_2 \cdot e^{-E_2/k_B T}}$$

where  $D$  is the negative thermal quenching coefficient which describes the contribution from thermally excited electrons,  $C_1$  and  $C_2$  are the thermal quenching coefficients related to non-radiative electrons excitation leading to thermal quenching,  $E$  is the activation energy for negative thermal quenching and  $E_1$  and  $E_2$  are the activation energies for typical thermal quenching, respectively and  $k_B$  is the Boltzmann constant.

| Compound                          | $C_1$              | $E_1$ (meV) | $C_2$              | $E_2$ (meV) | $D$                | $E$ (meV) |
|-----------------------------------|--------------------|-------------|--------------------|-------------|--------------------|-----------|
| BA <sub>2</sub> PbBr <sub>4</sub> | $1.03 \times 10^6$ | 4.03        | 0                  | 0           | $4.96 \times 10^5$ | 4.07      |
| BA <sub>2</sub> CuBr <sub>4</sub> | $8.75 \times 10^3$ | 23.84       | $4.50 \times 10^2$ | 0.24        | $3.56 \times 10^2$ | 0.08      |
| BA <sub>2</sub> SnBr <sub>4</sub> | $1.62 \times 10^4$ | 107.41      | 5.01               | 7.23        | 5.14               | 16.54     |

**Supplementary Table S 1:** Fitting parameters for the (negative) thermal quenching of the scintillation intensity of the perovskites.



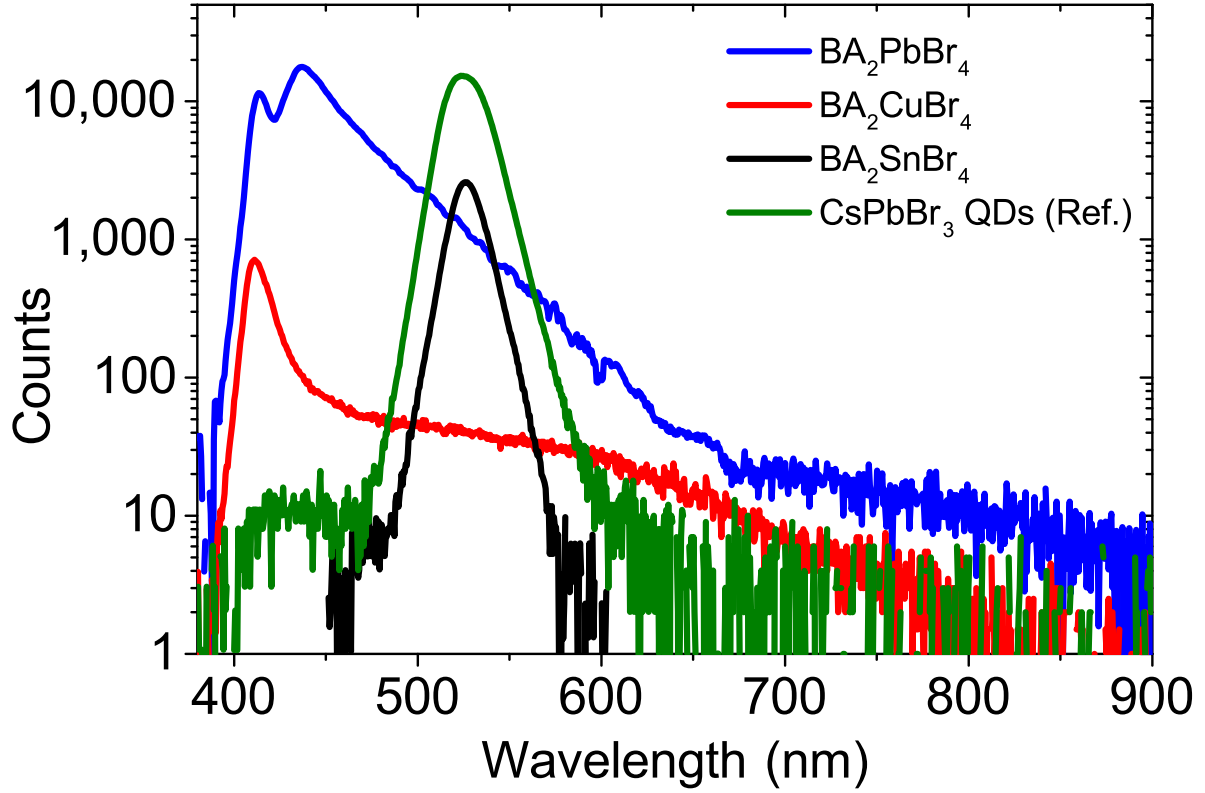

**Supplementary Figure S 6:** PL spectra recorded with integrating sphere of  $(\text{BA})_2\text{XBr}_4$  ( $\text{X} = \text{Pb}, \text{Cu}, \text{Sn}$ ) crystals.  $(\text{BA})_2\text{PbBr}_4$  (blue),  $(\text{BA})_2\text{CuBr}_4$  (red),  $(\text{BA})_2\text{SnBr}_4$  (black), and  $\text{CsPbBr}_3$  QDs (dark green).

#### IV. QUANTUM YIELD

To determine the PL quantum yield (PLQY) sample ( $Q_s$ ), the following equation is used:

$$Q_s = Q_r \left( \frac{A_r}{A} \right) \left( \frac{E_s}{E_r} \right) \left( \frac{n_s}{n_r} \right)^2$$

where  $Q$  is the PLQY value,  $n$  is the refractive index of the crystals,  $A$  is the absorbance of the crystals and  $E$  is the integrated PL intensity of the emitted light. The subscript “s” and “r” refer to the reference and unknown emitter, respectively. This method is modified from de Mello et al. as here we used a reference sample that was already known its properties.<sup>5</sup> As a reference,  $\text{CsPbBr}_3$  quantum dots incorporated to the resin from Nanolumi was used without further purification.<sup>6</sup> Those samples already measured in Nanolumi and the results

were obtained from a private communication.<sup>7</sup> We note that  $Q_r = 64.712\%$ ,  $n_r = 2.3$ ,  $A_r = 0.85$ . The PL spectra measured by Labsphere integrating sphere can be found in Supplementary Figure S6 above. Based on the analyses of the refractive index, the integrated PL intensity of the emitted light, and the absorbance of the samples, the PLQY (in %) are determined as shown in Supplementary Table S2 below.

| Thin Films                        | PLQY (%) |
|-----------------------------------|----------|
| BA <sub>2</sub> PbBr <sub>4</sub> | 36       |
| BA <sub>2</sub> CuBr <sub>4</sub> | 1        |
| BA <sub>2</sub> SnBr <sub>4</sub> | 13       |

**Supplementary Table S 2:** A summary of the extracted PLQY of the single crystals.

The highest PLQY of 36% is recorded for BA<sub>2</sub>PbBr<sub>4</sub> and this value well corresponds with previous observations of 2D Mn doped BA<sub>2</sub>PbBr<sub>4</sub> and 0D (C<sub>4</sub>H<sub>16</sub>N<sub>3</sub>)PbCl<sub>5</sub>·H<sub>2</sub>O perovskite halide crystals with PLQY values of 26 and 40%, respectively.<sup>8,9</sup> Moreover, this value is also reasonable with regard to those reported for (C<sub>6</sub>H<sub>5</sub>CH<sub>2</sub>NH<sub>3</sub>)<sub>2</sub>Pb·Br<sub>4</sub> (BZA<sub>2</sub>PbBr<sub>4</sub>) exfoliated crystals with the best and average PLQY values of 79% and 60%, respectively.<sup>10</sup> Other data can be obtained through corresponding authors.

## REFERENCES

- <sup>1</sup>R. J. Elliott, Phys. Rev. **108**, 1384 (1957).
- <sup>2</sup>M. D. Birowosuto, D. Cortecchia, W. Drozdowski, K. Brylew, W. Lachmanski, A. Bruno, and C. Soci, Sci. Rep. **6**, 37254 (2016).
- <sup>3</sup>J. T. Randall and M. H. F. Wilkins, Proc. R. Soc. Lond. A **184**, 365 (1945).
- <sup>4</sup>H. Shibata, Jpn. J. Appl. Phys. **37**, 550 (1998).
- <sup>5</sup>J. C. de Mello, H. F. Wittmann, and R. H. Friend, Adv. Mater. **9**, 230 (1997).
- <sup>6</sup>Nanolumi, “Perovskite color enhancement film for premium displays— nanolumi,” (n.d.).
- <sup>7</sup>E. Chua, personal communication (2021).

- <sup>8</sup>T. Sheikh and A. Nag, *J. Phys. Chem. C* **123**, 9420 (2019).
- <sup>9</sup>A. Yangui, R. Roccanova, Y. Wu, M.-H. Du, and B. Saparov, *J. Phys. Chem. C* **123**, 22470 (2019).
- <sup>10</sup>X. Gong, O. Voznyy, A. Jain, W. Liu, R. Sabatini, Z. Piontkowski, G. Walters, G. Bappi, S. Nokhrin, O. Bushuyev, M. Yuan, R. Comin, D. McCamant, S. O. Kelley, and E. H. Sargent, *Nat. Mater.* **17**, 550–556 (2018).
